# Supplementary material for: Passive transfer of modest titers of potent and broadly neutralizing anti-HIV monoclonal antibodies block SHIV infection in macaques
Source: PubMed Central journal article supplement — J Exp Med. 2014 Sep 22;211(10):2061–74. doi: 10.1084/jem.20132494 (PMC4172223; doi:10.1084/jem.20132494), 2014-09-22
Supplement: supp_jem.20132494_JEM_20132494_sm.pdf [file supp_jem.20132494_JEM_20132494_sm.pdf]

## SUPPLEMENTAL MATERIAL

Shingai et al., <http://www.jem.org/cgi/content/full/jem.20132494/DC1>**Table S1.** Anti-HIV IC<sub>50</sub> neutralization titers determined in rhesus PBMC

| mAb     | IC <sub>50</sub> PBMC |                            |
|---------|-----------------------|----------------------------|
|         | SHIV <sub>AD8EO</sub> | SHIV <sub>DH12-V3AD8</sub> |
| VRC01   | 3.73                  | 9.34                       |
| PGT-121 | 0.55                  | 0.31                       |
| 10-1074 | 0.74                  | 0.41                       |
| 45-46m2 | ND                    | 2.42                       |
| 3BNC117 | 0.74                  | 2.04                       |

IC<sub>50</sub> concentrations of indicated mAbs derived from 14-d neutralizing assays performed using rhesus macaque PBMC and <sup>32</sup>P RT assay as readout. ND, not done.

**Table S2.** Determination of the 50% protection titer against SHIV<sub>AD8EO</sub> (Reed and Muench, 1938)

| Endpoint neutralization titer in plasma | Animal number |          | Accumulated value      |                       | Protected |                 |
|-----------------------------------------|---------------|----------|------------------------|-----------------------|-----------|-----------------|
|                                         | Protected     | Infected | Protected <sup>a</sup> | Infected <sup>b</sup> | Ratio     | Percentage      |
| SHIV <sub>AD8EO</sub>                   |               |          |                        |                       |           |                 |
| 2,773                                   | 1             | 0        | 12                     | 0                     | 12/12     | 100             |
| 2,495                                   | 1             | 0        | 11                     | 0                     | 11/11     | 100             |
| 2,075                                   | 1             | 0        | 10                     | 0                     | 10/10     | 100             |
| 2,004                                   | 1             | 0        | 9                      | 0                     | 9/9       | 100             |
| 633                                     | 1             | 0        | 8                      | 0                     | 8/8       | 100             |
| 618                                     | 0             | 1        | 7                      | 1                     | 7/8       | 88              |
| 563                                     | 1             | 0        | 7                      | 1                     | 7/8       | 88              |
| 384                                     | 1             | 0        | 6                      | 1                     | 6/7       | 86              |
| 372                                     | 1             | 0        | 5                      | 1                     | 5/6       | 83              |
| 272                                     | 1             | 0        | 4                      | 1                     | 4/5       | 80              |
| 176                                     | 0             | 1        | 3                      | 2                     | 3/5       | 60              |
| 162                                     | 1             | 0        | 3                      | 2                     | 3/5       | 60              |
| 115                                     | 1             | 0        | 2                      | 2                     | 2/4       | 50 <sup>c</sup> |
| 75                                      | 0             | 1        | 1                      | 3                     | 1/4       | 25              |
| 68                                      | 0             | 1        | 1                      | 4                     | 1/5       | 20              |
| 65                                      | 0             | 1        | 1                      | 5                     | 1/6       | 17              |
| 56                                      | 0             | 1        | 1                      | 6                     | 1/7       | 14              |
| 55                                      | 1             | 0        | 1                      | 6                     | 1/7       | 14              |
| 55                                      | 0             | 1        | 0                      | 7                     | 0/7       | 0               |
| 53                                      | 0             | 1        | 0                      | 8                     | 0/8       | 0               |
| 27                                      | 0             | 1        | 0                      | 9                     | 0/9       | 0               |
| 20                                      | 0             | 1        | 0                      | 10                    | 0/10      | 0               |
| 20                                      | 0             | 1        | 0                      | 11                    | 0/11      | 0               |
| 20                                      | 0             | 1        | 0                      | 12                    | 0/12      | 0               |
| 20                                      | 0             | 1        | 0                      | 13                    | 0/13      | 0               |
| 17                                      | 0             | 1        | 0                      | 14                    | 0/14      | 0               |

<sup>a</sup>Sum from the bottom.

<sup>b</sup>Sum from the top.

<sup>c</sup>Endpoint protection titer (50% protective titer) was calculated to be 1:115.

**Table S3.** Determination of the 50% protection titer against SHIV<sub>DH12-V3AD8</sub> (Reed and Muench, 1938)

| Endpoint neutralization titer in plasma | Animal number |          | Accumulated value      |                       | Protected |                 |
|-----------------------------------------|---------------|----------|------------------------|-----------------------|-----------|-----------------|
|                                         | Protected     | Infected | Protected <sup>a</sup> | Infected <sup>b</sup> | Ratio     | Percentage      |
| SHIV <sub>DH12-V3AD8</sub>              |               |          |                        |                       |           |                 |
| 13,805                                  | 1             | 0        | 16                     | 0                     | 16/16     | 100             |
| 13,120                                  | 1             | 0        | 15                     | 0                     | 15/15     | 100             |
| 12,669                                  | 1             | 0        | 14                     | 0                     | 14/14     | 100             |
| 12,055                                  | 1             | 0        | 13                     | 0                     | 13/13     | 100             |
| 2,282                                   | 1             | 0        | 12                     | 0                     | 12/12     | 100             |
| 1,972                                   | 1             | 0        | 11                     | 0                     | 11/11     | 100             |
| 539                                     | 0             | 1        | 10                     | 1                     | 10/11     | 91              |
| 422                                     | 1             | 0        | 10                     | 1                     | 10/11     | 91              |
| 420                                     | 1             | 0        | 9                      | 1                     | 9/10      | 90              |
| 376                                     | 1             | 0        | 8                      | 1                     | 8/9       | 89              |
| 159                                     | 1             | 0        | 7                      | 1                     | 7/8       | 88              |
| 143                                     | 1             | 0        | 6                      | 1                     | 6/7       | 86              |
| 142                                     | 1             | 0        | 5                      | 1                     | 5/6       | 83              |
| 136                                     | 0             | 1        | 4                      | 2                     | 4/6       | 67              |
| 106                                     | 1             | 0        | 4                      | 2                     | 4/6       | 67              |
| 101                                     | 1             | 0        | 3                      | 2                     | 3/5       | 60 <sup>c</sup> |
| 90                                      | 0             | 1        | 2                      | 3                     | 2/5       | 40 <sup>c</sup> |
| 80                                      | 1             | 0        | 2                      | 3                     | 2/5       | 40              |
| 70                                      | 0             | 1        | 1                      | 4                     | 1/5       | 20              |
| 52                                      | 1             | 0        | 1                      | 4                     | 1/5       | 20              |
| 39                                      | 0             | 1        | 0                      | 5                     | 0/5       | 0               |
| 35                                      | 0             | 1        | 0                      | 6                     | 0/6       | 0               |
| 20                                      | 0             | 1        | 0                      | 7                     | 0/7       | 0               |
| 20                                      | 0             | 1        | 0                      | 8                     | 0/8       | 0               |
| 20                                      | 0             | 1        | 0                      | 9                     | 0/9       | 0               |
| 20                                      | 0             | 1        | 0                      | 10                    | 0/10      | 0               |
| 20                                      | 0             | 1        | 0                      | 11                    | 0/11      | 0               |
| 20                                      | 0             | 1        | 0                      | 12                    | 0/12      | 0               |
| 20                                      | 0             | 1        | 0                      | 13                    | 0/13      | 0               |

<sup>a</sup>Sum from the bottom.

<sup>b</sup>Sum from the top.

<sup>c</sup>Endpoint protection titer (50% protective titer) was calculated to be 1:95.5.
